# Supplementary material for: Fungal and Bacterial Diversity Patterns of Two Diversity Levels Retrieved From a Late Decaying Fagus sylvatica Under Two Temperature Regimes
Source: Front Microbiol. 2021 Jan 11;11:548793. doi: 10.3389/fmicb.2020.548793 (PMC7874115; doi:10.3389/fmicb.2020.548793)
Supplement: Supplementary file 2 [file Table_1.xlsx]

## Sheet: sterile_bacteria
#OTU ID	T0-S	T5-Sf	T5-Sc	T6-Sf	T6-Sc	T7-Sf	T7-Sc	T8-Sf	T8-Sc	T1-Sf	T1-Sc	T2-Sf	T3-Sf	T3-Sc	T4-Sf	T4-Sc	Kingdom	Phylum	Class	Order	Family	Genus
Otu000008	0.00344459	0	0.101568	0.0629941	0.149142	0	0.0117288	0.0100304	0	0.0146007	0.028372	0	0.00698714	0.0195274	0.0125177	0.0330991	Bacteria	Acidobacteria	Acidobacteria	Acidobacteriales	Acidobacteriaceae_(Subgroup_1)	Granulicella
Otu000003	0.0275567	0	0.0389342	0.00629941	0	0.00551785	0.0117288	0	0.0135569	0	0	0.0348508	0.0419229	0	0	0.0254608	Bacteria	Actinobacteria	Actinobacteria	Micrococcales	Microbacteriaceae	unclassified
Otu000002	0.0103338	0	0.0355486	0.0629941	0	0.00735713	0.0175932	0	0.0225948	0	0.042558	0.00435635	0	0	0.00834516	0.0127304	Bacteria	Proteobacteria	Alphaproteobacteria	Sphingomonadales	Sphingomonadaceae	Sphingomonas
Otu000005	0.00344459	0.00811721	0.0473982	0.0377965	0.149142	0.00183928	0.0117288	0	0	0	0.028372	0.0087127	0	0	0.00417258	0.0330991	Bacteria	Proteobacteria	Betaproteobacteria	Burkholderiales	Burkholderiaceae	Burkholderia
Otu000013	0	0.0324689	0.0220063	0.0472456	0	0	0.00586441	0	0	0	0.0368836	0	0	0.00976372	0	0.00763825	Bacteria	Proteobacteria	Alphaproteobacteria	Rhodospirillales	Acetobacteraceae	unclassified
Otu000006	0	0	0.0169279	0.0314971	0	0	0	0	0	0	0.0028372	0	0	0	0	0.0152765	Bacteria	Actinobacteria	Actinobacteria	Micrococcales	Microbacteriaceae	Frondihabitans
Otu000007	0.00688919	0	0.0423198	0.0157485	0	0	0.00586441	0	0	0	0	0	0.00698714	0	0	0	Bacteria	Proteobacteria	Gammaproteobacteria	Xanthomonadales	Xanthomonadaceae	Luteibacter
Otu000024	0	0	0.0338558	0.0409462	0.0745712	0	0.0117288	0.00668695	0	0	0.0170232	0.00435635	0	0	0.00417258	0.0101843	Bacteria	Bacteroidetes	Sphingobacteriia	Sphingobacteriales	Sphingobacteriaceae	Mucilaginibacter
Otu000012	0	0	0.0287775	0.0314971	0.0745712	0	0.0234577	0	0	0	0.028372	0	0	0	0	0.0152765	Bacteria	Proteobacteria	Gammaproteobacteria	Xanthomonadales	Xanthomonadaceae	Rhodanobacter
Otu000014	0	0.00405861	0.0270847	0.0188982	0	0	0.0175932	0	0	0	0	0	0.00698714	0	0	0.00509217	Bacteria	Actinobacteria	Actinobacteria	Micrococcales	Microbacteriaceae	Gryllotalpicola
Otu000019	0	0	0.00507838	0.0314971	0	0.00367857	0	0.00334348	0	0.0146007	0.0028372	0	0	0	0	0.00254608	Bacteria	Proteobacteria	Alphaproteobacteria	Rhizobiales	Beijerinckiaceae	unclassified
Otu000017	0.00344459	0	0.0186207	0.0157485	0	0	0	0.00668695	0	0	0	0	0	0.00976372	0	0.00509217	Bacteria	Acidobacteria	Acidobacteria	Acidobacteriales	Acidobacteriaceae_(Subgroup_1)	Terriglobus
Otu000018	0.00344459	0.00811721	0.0203135	0.0188982	0.149142	0	0.0117288	0	0	0	0.0056744	0	0	0	0.0125177	0.0127304	Bacteria	Proteobacteria	Gammaproteobacteria	Xanthomonadales	Xanthomonadaceae	unclassified
Otu000021	0	0	0.0169279	0.00314971	0.0745712	0.00919642	0	0.00668695	0	0	0.0226976	0	0.0139743	0	0	0.0178226	Bacteria	Proteobacteria	Betaproteobacteria	Burkholderiales	Burkholderiaceae	unclassified
Otu000025	0	0	0.0169279	0.00629941	0.0745712	0	0	0	0	0	0	0	0	0	0	0.00254608	Bacteria	Acidobacteria	Acidobacteria	Acidobacteriales	Acidobacteriaceae_(Subgroup_1)	unclassified
Otu000022	0	0	0.00846396	0.0220479	0	0	0	0.00334348	0	0	0.0028372	0	0	0	0	0.00509217	Bacteria	Actinobacteria	Actinobacteria	Propionibacteriales	Nocardioidaceae	Nocardioides
Otu000026	0	0	0.00169279	0.00944912	0	0.00367857	0	0	0	0	0.0056744	0	0	0	0.00417258	0.00509217	Bacteria	Bacteroidetes	Sphingobacteriia	Sphingobacteriales	Sphingobacteriaceae	Pedobacter
Otu000037	0.017223	0.00405861	0.0203135	0.0157485	0	0	0.0117288	0.00334348	0.00903791	0	0.0113488	0.0087127	0	0.00976372	0.00417258	0.0178226	Bacteria	Proteobacteria	Alphaproteobacteria	Sphingomonadales	unclassified	unclassified
Otu000040	0	0	0.0236991	0.00629941	0	0	0.0175932	0	0	0	0	0	0	0	0.00417258	0.00763825	Bacteria	Bacteroidetes	Sphingobacteriia	Sphingobacteriales	Chitinophagaceae	unclassified
Otu000064	0.00344459	0	0.0152351	0.00629941	0	0	0	0	0	0	0	0.0392071	0	0.00976372	0	0	Bacteria	Proteobacteria	Alphaproteobacteria	Caulobacterales	Caulobacteraceae	unclassified
Otu000028	0.0137784	0.0365275	0.0186207	0.0283473	0	0.00183928	0.00586441	0.00668695	0.00903791	0.0146007	0.0312092	0	0.0279486	0	0.0166903	0.00763825	Bacteria	Proteobacteria	Alphaproteobacteria	Rhizobiales	Bradyrhizobiaceae	unclassified
Otu000046	0	0	0.0118495	0	0	0	0.00586441	0	0	0	0	0	0	0	0	0.00254608	Bacteria	Acidobacteria	Acidobacteria	Acidobacteriales	Acidobacteriaceae_(Subgroup_1)	Acidobacterium
Otu000038	0.00344459	0	0.0101568	0.0125988	0	0	0.0117288	0	0	0	0	0	0	0	0	0	Bacteria	Actinobacteria	Thermoleophilia	Solirubrobacterales	480-2	unclassified
Otu000042	0	0	0.00846396	0.00629941	0	0.00367857	0	0	0	0	0	0.013069	0	0	0	0	Bacteria	Proteobacteria	Alphaproteobacteria	Rhizobiales	Rhizobiales_Incertae_Sedis	Rhizomicrobium
Otu000031	0.00344459	0	0.00677117	0	0	0	0.00586441	0	0	0	0	0	0	0	0	0	Bacteria	Proteobacteria	Alphaproteobacteria	Rhodospirillales	Acetobacteraceae	Acidisoma
Otu000060	0	0	0.00338558	0	0	0	0	0	0.00451896	0	0	0	0	0	0	0.0407373	Bacteria	Planctomycetes	Planctomycetacia	Planctomycetales	Planctomycetaceae	Singulisphaera
Otu000044	0	0	0.00169279	0	0.0745712	0	0	0	0	0	0.0056744	0.00435635	0	0	0	0	Bacteria	Actinobacteria	Actinobacteria	Frankiales	Frankiaceae	Jatrophihabitans
Otu000045	0	0	0	0.00629941	0.149142	0.0147143	0	0.00668695	0	0	0.14186	0.0174254	0	0	0.00417258	0	Bacteria	Actinobacteria	Actinobacteria	Propionibacteriales	Propionibacteriaceae	Friedmanniella
Otu000054	0	0	0.00507838	0.00314971	0	0	0	0	0	0	0.028372	0	0	0	0	0.00509217	Bacteria	Proteobacteria	Gammaproteobacteria	unclassified	unclassified	unclassified
Otu000109	0.0137784	0	0.0135423	0.00314971	0	0	0	0.0100304	0	0	0	0	0	0.00976372	0.00834516	0.00509217	Bacteria	Candidate_division_TM7	unclassified	unclassified	unclassified	unclassified
Otu000057	0.00344459	0	0.00338558	0.00629941	0	0	0.0175932	0.00334348	0	0	0	0	0	0	0	0.00509217	Bacteria	Acidobacteria	Acidobacteria	Acidobacteriales	Acidobacteriaceae_(Subgroup_1)	Telmatobacter
Otu000056	0	0	0.00169279	0	0	0	0	0	0	0	0.0028372	0	0	0	0	0.00254608	Bacteria	Actinobacteria	Thermoleophilia	Solirubrobacterales	Conexibacteraceae	Conexibacter
Otu000062	0	0	0.00677117	0.00944912	0	0	0	0	0	0	0	0	0	0	0	0	Bacteria	Proteobacteria	Gammaproteobacteria	KM16	unclassified	unclassified
Otu000099	0.00688919	0	0	0	0.0745712	0	0	0	0	0	0	0	0	0	0	0	Bacteria	Planctomycetes	Planctomycetacia	Planctomycetales	Planctomycetaceae	unclassified
Otu000061	0	0	0.00338558	0	0	0	0	0	0	0	0	0	0	0	0	0	Bacteria	Acidobacteria	Acidobacteria	Acidobacteriales	Acidobacteriaceae_(Subgroup_1)	Acidicapsa
Otu000085	0	0.00405861	0	0	0	0	0	0	0	0	0	0.013069	0	0	0	0	Bacteria	Cyanobacteria	Melainabacteria	Obscuribacterales	unclassified	unclassified
Otu000082	0.881816	0.422095	0.727901	0.352767	0.298285	0.494767	0.586441	0.772343	2.32274	0.65703	0.380185	0.261381	0.558971	0.449131	0.584161	1.28832	Bacteria	Actinobacteria	Actinobacteria	Micromonosporales	Micromonosporaceae	unclassified
Otu000065	0	0	0	0	0	0	0	0	0	0	0	0	0	0	0	0	Bacteria	Proteobacteria	Alphaproteobacteria	Rhizobiales	Hyphomicrobiaceae	Hyphomicrobium
Otu000066	0	0	0.00338558	0.00629941	0	0	0	0	0	0	0	0.00435635	0	0	0	0	Bacteria	Actinobacteria	Actinobacteria	Streptomycetales	Streptomycetaceae	Streptacidiphilus
Otu000091	0.00688919	0.0121758	0.0220063	0.00944912	0	0.00735713	0.0234577	0.0234043	0.0180758	0	0.0312092	0.0261381	0	0.00976372	0.00834516	0.0560139	Bacteria	Proteobacteria	Gammaproteobacteria	Pseudomonadales	Pseudomonadaceae	Pseudomonas
Otu000069	0.00344459	0	0.0118495	0	0	0.00551785	0	0.00334348	0	0	0	0	0	0	0	0	Bacteria	Proteobacteria	Alphaproteobacteria	Rhizobiales	Rhizobiaceae	Rhizobium
Otu000101	0.00344459	0	0	0.00314971	0	0.00183928	0	0	0	0	0	0	0.00698714	0	0	0	Bacteria	Proteobacteria	Alphaproteobacteria	Rhizobiales	alphaI_cluster	unclassified
Otu000071	0	0	0	0	0	0.00551785	0	0	0	0	0	0	0	0	0	0	Bacteria	Proteobacteria	Alphaproteobacteria	Rhizobiales	Bradyrhizobiaceae	Tardiphaga
Otu000129	0	0	0.00507838	0	0	0	0	0	0	0	0	0	0	0	0	0	Bacteria	Actinobacteria	Thermoleophilia	Solirubrobacterales	unclassified	unclassified
Otu000098	0.00688919	0.00811721	0.0152351	0	0	0.00919642	0.0117288	0	0.00903791	0	0	0.013069	0.0139743	0	0.00834516	0.0152765	Bacteria	Actinobacteria	unclassified	unclassified	unclassified	unclassified
Otu000124	0	0	0	0	0	0	0	0	0	0	0	0	0	0	0	0	Bacteria	Actinobacteria	Actinobacteria	Propionibacteriales	Propionibacteriaceae	Microlunatus
Otu000083	0	0	0.00338558	0	0	0	0	0	0	0	0	0	0	0	0	0	Bacteria	Proteobacteria	Gammaproteobacteria	Xanthomonadales	Xanthomonadaceae	Dyella
Otu000193	0	0.00811721	0.0135423	0.00314971	0	0	0	0	0	0	0	0	0	0	0	0	Bacteria	Proteobacteria	Alphaproteobacteria	unclassified	unclassified	unclassified
Otu000096	0	0	0.00169279	0	0	0	0	0	0.0180758	0	0	0	0	0	0	0.00254608	Bacteria	Proteobacteria	Alphaproteobacteria	Rhizobiales	1174-901-12	unclassified
Otu000092	0	0	0.00338558	0.00314971	0	0.00367857	0	0	0	0	0	0	0	0	0	0	Bacteria	Proteobacteria	Alphaproteobacteria	Rhizobiales	Hyphomicrobiaceae	Devosia
Otu000210	0	0	0	0	0	0	0	0	0	0	0	0	0	0	0	0	Bacteria	Proteobacteria	Gammaproteobacteria	Legionellales	Coxiellaceae	Aquicella
Otu000102	0	0	0.0118495	0	0	0	0	0	0	0	0	0	0	0	0	0	Bacteria	Proteobacteria	Alphaproteobacteria	Rhodospirillales	Rhodospirillaceae	Telmatospirillum
Otu000100	0	0.00405861	0.00169279	0.00629941	0	0	0	0	0	0	0	0	0	0	0	0.00763825	Bacteria	Proteobacteria	Alphaproteobacteria	Rhodospirillales	Rhodospirillaceae	Skermanella
Otu000113	0	0	0.00169279	0.00629941	0	0	0.00586441	0	0	0	0	0.00435635	0	0	0	0.00509217	Bacteria	Proteobacteria	Betaproteobacteria	Burkholderiales	Oxalobacteraceae	unclassified
Otu000103	0	0.00405861	0	0	0	0	0	0	0	0	0	0	0	0	0	0	Bacteria	WD272	unclassified	unclassified	unclassified	unclassified
Otu000137	0	0	0	0.0125988	0	0	0	0	0	0	0	0	0	0	0	0	Bacteria	Proteobacteria	Betaproteobacteria	unclassified	unclassified	unclassified
Otu000112	0	0	0	0	0	0	0	0	0	0	0	0	0	0	0	0	Bacteria	Actinobacteria	Actinobacteria	Frankiales	Acidothermaceae	Acidothermus
Otu000110	0	0.0121758	0	0	0	0	0	0	0	0	0	0	0	0	0	0	Bacteria	Acidobacteria	Acidobacteria	Acidobacteriales	Acidobacteriaceae_(Subgroup_1)	Bryocella
Otu000144	0	0	0.00507838	0	0	0.00367857	0	0	0.00451896	0	0	0	0	0	0.00417258	0.00254608	Bacteria	Actinobacteria	Actinobacteria	Corynebacteriales	Mycobacteriaceae	Mycobacterium
Otu000192	0.00688919	0	0	0	0.0745712	0	0	0	0	0	0	0	0	0	0	0	Bacteria	Planctomycetes	Phycisphaerae	WD2101_soil_group	unclassified	unclassified
Otu000198	0	0	0.00338558	0.00314971	0	0	0.00586441	0	0.00451896	0	0.0028372	0	0	0	0	0	Bacteria	Proteobacteria	Alphaproteobacteria	Rhizobiales	unclassified	unclassified
Otu000116	0	0	0	0	0	0	0	0	0	0	0	0	0	0	0	0	Bacteria	Proteobacteria	Betaproteobacteria	Burkholderiales	Comamonadaceae	Aquincola
Otu000147	0	0	0	0	0	0	0	0	0	0	0	0	0	0	0	0	Bacteria	Proteobacteria	unclassified	unclassified	unclassified	unclassified
Otu000159	0	0	0	0	0	0	0	0	0	0	0	0	0	0	0	0	Bacteria	Planctomycetes	Planctomycetacia	Planctomycetales	Planctomycetaceae	Isosphaera
Otu000123	0	0	0	0	0.0745712	0	0	0	0	0	0	0	0	0	0	0	Bacteria	Acidobacteria	Acidobacteria	Acidobacteriales	Acidobacteriaceae_(Subgroup_1)	Edaphobacter
Otu000162	0	0	0.00169279	0.00314971	0	0.00183928	0	0	0	0	0	0	0	0	0	0	Bacteria	Actinobacteria	Actinobacteria	Frankiales	Nakamurellaceae	Nakamurella
Otu000139	0	0	0.00169279	0	0	0	0	0	0	0	0	0	0	0	0	0	Bacteria	Actinobacteria	Thermoleophilia	Solirubrobacterales	YNPFFP1	unclassified
Otu000150	0	0	0.00507838	0	0	0	0	0	0	0	0	0	0	0	0	0.00763825	Bacteria	Proteobacteria	Deltaproteobacteria	Myxococcales	0319-6G20	unclassified
Otu000131	0	0	0	0	0	0	0	0	0	0	0	0	0	0	0	0	Bacteria	Chlamydiae	Chlamydiae	Chlamydiales	unclassified	unclassified
Otu000133	0	0	0	0	0	0	0	0	0	0	0.0028372	0	0	0	0	0	Bacteria	Actinobacteria	Actinobacteria	Micrococcales	Microbacteriaceae	Amnibacterium
Otu000166	0	0	0.00169279	0	0	0	0	0	0	0	0	0	0	0	0	0	Bacteria	Proteobacteria	Gammaproteobacteria	Legionellales	Legionellaceae	Legionella
Otu000201	0	0	0	0	0	0	0	0	0	0	0	0	0	0	0	0	Bacteria	Proteobacteria	Alphaproteobacteria	Rhodospirillales	unclassified	unclassified
Otu000149	0	0	0	0	0	0	0	0	0	0	0	0	0	0	0	0	Bacteria	Proteobacteria	Alphaproteobacteria	Rhodospirillales	Rhodospirillaceae	Inquilinus
Otu000327	0.00344459	0	0.00338558	0	0	0	0	0	0	0	0	0	0	0	0	0	Bacteria	Actinobacteria	Actinobacteria	unclassified	unclassified	unclassified
Otu000195	0	0	0.0135423	0	0	0	0	0	0	0	0	0	0	0	0	0	Bacteria	Proteobacteria	Alphaproteobacteria	DB1-14	unclassified	unclassified
Otu000211	0	0	0	0	0	0	0	0	0	0	0	0	0	0	0	0	Bacteria	Chlamydiae	Chlamydiae	Chlamydiales	Parachlamydiaceae	Neochlamydia
Otu000151	0.0861148	0.0324689	0.0304703	0.00314971	0	0.0312678	0.0821018	0.0167174	0.0858602	0.087604	0.0085116	0.00435635	0.0628843	0.00976372	0.0500709	0.0865669	Bacteria	Actinobacteria	Actinobacteria	Micrococcales	Cellulomonadaceae	unclassified
Otu000202	0	0	0.00507838	0	0	0	0	0	0	0	0	0	0	0	0	0	Bacteria	Actinobacteria	Actinobacteria	Propionibacteriales	Nocardioidaceae	Marmoricola
Otu000252	0.00344459	0	0	0.00944912	0	0	0	0	0	0	0	0	0	0	0	0	Bacteria	Planctomycetes	Planctomycetacia	Planctomycetales	Planctomycetaceae	Gemmata
Otu000196	0	0	0	0	0	0	0	0	0	0	0	0	0	0	0	0	Bacteria	Verrucomicrobia	Spartobacteria	Chthoniobacterales	FukuN18_freshwater_group	unclassified
Otu000278	0	0	0.00507838	0	0	0	0	0	0	0	0	0	0	0	0	0	Bacteria	Chlamydiae	Chlamydiae	Chlamydiales	Parachlamydiaceae	Candidatus_Protochlamydia
Otu000338	0	0.0121758	0.0101568	0	0	0	0	0	0	0	0	0	0	0	0	0	Bacteria	Proteobacteria	Alphaproteobacteria	Rickettsiales	SM2D12	unclassified
Otu000250	0	0	0	0	0	0	0	0	0	0	0	0	0	0	0	0	Bacteria	Actinobacteria	Thermoleophilia	Solirubrobacterales	Patulibacteraceae	Patulibacter
Otu000183	0	0	0	0	0	0	0	0	0	0	0	0	0	0	0	0	Bacteria	Actinobacteria	Actinobacteria	Propionibacteriales	unclassified	unclassified
Otu000215	0	0	0.00338558	0	0	0	0	0	0	0	0	0	0	0	0	0	Bacteria	Proteobacteria	Betaproteobacteria	Burkholderiales	Alcaligenaceae	unclassified
Otu000225	0	0	0	0	0	0	0	0	0	0	0	0	0	0	0	0	Bacteria	Verrucomicrobia	Spartobacteria	Chthoniobacterales	Chthoniobacteraceae	Chthoniobacter
Otu000203	0	0	0.00169279	0.00314971	0	0	0	0	0	0	0	0	0	0	0	0	Bacteria	Cyanobacteria	unclassified	unclassified	unclassified	unclassified
Otu000374	0	0	0	0	0	0	0	0	0	0	0	0	0	0	0	0	Bacteria	Chlamydiae	Chlamydiae	Chlamydiales	Parachlamydiaceae	unclassified
Otu000165	0	0	0.00677117	0	0	0	0	0	0	0	0	0	0	0	0	0	Bacteria	Proteobacteria	Alphaproteobacteria	Rhizobiales	Rhizobiales_Incertae_Sedis	Bauldia
Otu000206	0	0	0.00169279	0	0	0	0	0	0	0	0.0226976	0	0	0	0	0	Bacteria	Actinobacteria	Actinobacteria	Pseudonocardiales	Pseudonocardiaceae	Actinomycetospora
Otu000220	0	0	0	0	0	0	0	0	0	0	0	0	0	0	0	0	Bacteria	Actinobacteria	Acidimicrobiia	Acidimicrobiales	unclassified	unclassified
Otu000218	0	0	0	0	0	0	0	0	0	0	0	0	0	0	0	0	Bacteria	Proteobacteria	Alphaproteobacteria	Rhodospirillales	Rhodospirillaceae	unclassified
Otu000256	0	0	0	0	0	0	0	0	0	0	0	0	0	0	0	0	Bacteria	TM6	unclassified	unclassified	unclassified	unclassified
Otu000322	0	0	0	0	0	0	0	0	0	0	0.0170232	0	0	0	0	0.00254608	Bacteria	Verrucomicrobia	OPB35_soil_group	unclassified	unclassified	unclassified
Otu000188	0	0	0	0	0	0	0	0	0	0	0	0	0	0	0	0	Bacteria	Actinobacteria	Actinobacteria	Micromonosporales	Micromonosporaceae	Actinoplanes
Otu000359	0.0137784	0.00405861	0.00338558	0	0	0.00367857	0.0117288	0.274165	0.00903791	0.0292013	0.0170232	0	0.0139743	0	0.0208629	0.0101843	Bacteria	Proteobacteria	Gammaproteobacteria	Enterobacteriales	Enterobacteriaceae	unclassified
Otu000229	0	0	0	0	0	0	0	0	0	0	0	0	0	0	0	0	Bacteria	Bacteroidetes	Sphingobacteriia	Sphingobacteriales	Chitinophagaceae	Chitinophaga
Otu000226	0	0.00811721	0	0	0	0.00919642	0.00586441	0.00334348	0.00451896	0	0.0397208	0	0.00698714	0.00976372	0.0417258	0.00509217	Bacteria	Proteobacteria	Alphaproteobacteria	Rhizobiales	Methylobacteriaceae	Methylobacterium
Otu000214	0	0	0	0	0	0	0	0	0	0	0	0	0	0	0	0	Bacteria	Proteobacteria	Betaproteobacteria	Burkholderiales	Burkholderiaceae	Pandoraea
Otu000277	0	0	0	0	0	0	0	0	0	0	0	0	0	0	0	0	Bacteria	Planctomycetes	Phycisphaerae	CPla-3_termite_group	unclassified	unclassified
Otu000236	0	0	0.0457054	0.00314971	0	0	0	0	0	0	0.0226976	0	0.0139743	0.0195274	0	0	Bacteria	Proteobacteria	Alphaproteobacteria	Sphingomonadales	Sphingomonadaceae	Sphingobium
Otu000177	0	0	0	0	0	0	0	0	0	0	0	0	0	0	0	0	Bacteria	Chloroflexi	Ktedonobacteria	Ktedonobacterales	unclassified	unclassified
Otu000219	0	0	0	0	0	0	0	0	0	0	0	0	0	0	0	0	Bacteria	Verrucomicrobia	Spartobacteria	Chthoniobacterales	Xiphinematobacteraceae	Candidatus_Xiphinematobacter
Otu000331	0	0	0.00338558	0	0	0	0	0	0	0	0.0113488	0	0	0	0.00417258	0	Bacteria	Proteobacteria	Alphaproteobacteria	Sphingomonadales	Sphingomonadaceae	unclassified
Otu000319	0	0	0	0	0	0	0	0	0	0	0	0.00435635	0	0	0	0	Bacteria	Proteobacteria	Deltaproteobacteria	Myxococcales	Polyangiaceae	Sorangium
Otu000379	0	0	0	0.0220479	0	0	0	0	0.00451896	0	0	0	0	0	0	0	Bacteria	Chloroflexi	Thermomicrobia	JG30-KF-CM45	unclassified	unclassified
Otu000381	0	0	0.00677117	0	0	0	0	0	0	0	0	0	0	0	0	0	Bacteria	Actinobacteria	Actinobacteria	Frankiales	unclassified	unclassified
Otu000231	0	0	0.00338558	0	0	0	0	0	0	0	0	0	0	0	0	0	Bacteria	Proteobacteria	Gammaproteobacteria	Legionellales	Coxiellaceae	Coxiella
Otu000257	0.017223	0	0	0	0	0	0	0	0.00451896	0	0	0	0	0	0	0	Bacteria	Proteobacteria	Alphaproteobacteria	Rhodospirillales	Rhodospirillales_Incertae_Sedis	Reyranella
Otu000248	0	0.020293	0.00846396	0	0	0	0	0.00334348	0	0	0	0	0	0	0	0	Bacteria	Actinobacteria	Actinobacteria	Micrococcales	Intrasporangiaceae	unclassified
Otu000334	0	0	0	0	0	0	0	0.00334348	0	0	0	0	0	0	0	0	Bacteria	Proteobacteria	Alphaproteobacteria	Caulobacterales	Caulobacteraceae	Phenylobacterium
Otu000358	0.00344459	0	0	0.00314971	0.0745712	0	0	0.00668695	0.00451896	0.0292013	0	0.00435635	0	0	0	0	Bacteria	Bacteroidetes	Flavobacteriia	Flavobacteriales	Flavobacteriaceae	Flavobacterium
Otu000270	0	0	0	0	0	0	0	0	0	0	0	0	0	0	0	0	Bacteria	Proteobacteria	Alphaproteobacteria	Rhizobiales	Xanthobacteraceae	Labrys
Otu000233	0	0.00405861	0	0.00629941	0	0	0	0	0	0.0146007	0	0	0	0	0	0	Bacteria	Proteobacteria	Alphaproteobacteria	Caulobacterales	Caulobacteraceae	Brevundimonas
Otu000458	0	0	0	0	0	0	0	0	0	0	0	0	0	0.00976372	0	0	Bacteria	Proteobacteria	Deltaproteobacteria	Bdellovibrionales	Bdellovibrionaceae	Bdellovibrio
Otu000263	0	0	0	0	0	0	0	0	0	0	0	0	0	0	0	0	Bacteria	Actinobacteria	Actinobacteria	Kineosporiales	Kineosporiaceae	Kineosporia
Otu000636	0	0	0	0	0	0	0	0	0	0	0.0085116	0	0	0	0	0	Bacteria	Proteobacteria	Betaproteobacteria	Burkholderiales	unclassified	unclassified
Otu000415	0	0	0	0	0	0	0	0	0	0	0	0	0	0	0	0	Bacteria	Bacteroidetes	Sphingobacteriia	Sphingobacteriales	Chitinophagaceae	Taibaiella
Otu000465	0.0241122	0	0.00338558	0.00314971	0	0.0147143	0	0.0200609	0.0542275	0	0.042558	0.0261381	0.0419229	0.00976372	0	0	Bacteria	Actinobacteria	Actinobacteria	Propionibacteriales	Propionibacteriaceae	unclassified
Otu000279	0	0.00405861	0	0	0	0	0.0293221	0	0	0	0	0	0	0	0	0	Bacteria	Actinobacteria	Actinobacteria	Micrococcales	Microbacteriaceae	Microbacterium
Otu000281	0	0	0	0	0	0	0	0	0	0	0	0	0	0	0	0	Bacteria	Proteobacteria	Gammaproteobacteria	Xanthomonadales	Xanthomonadaceae	Dokdonella
Otu000273	0	0	0	0	0	0	0	0	0	0	0	0	0	0	0	0	Bacteria	Bacteroidetes	Sphingobacteriia	Sphingobacteriales	Chitinophagaceae	Hydrotalea
Otu000258	0	0	0.00169279	0	0	0	0	0	0	0	0	0	0	0	0	0	Bacteria	Actinobacteria	Thermoleophilia	Solirubrobacterales	TM146	unclassified
Otu000339	0	0	0	0	0	0	0	0	0	0	0	0	0	0	0	0	Bacteria	Proteobacteria	Deltaproteobacteria	Myxococcales	Haliangiaceae	Haliangium
Otu000286	0	0	0	0.00629941	0	0	0	0	0	0	0.0113488	0	0	0	0	0	Bacteria	Proteobacteria	Alphaproteobacteria	Sphingomonadales	Sphingomonadaceae	Novosphingobium
Otu000403	0	0	0	0.00314971	0	0	0	0	0	0	0	0	0	0	0.00834516	0.00509217	Bacteria	Actinobacteria	Actinobacteria	Pseudonocardiales	Pseudonocardiaceae	Pseudonocardia
Otu000391	0.00344459	0	0	0	0	0.00183928	0.00586441	0.0100304	0	0	0	0	0	0	0	0	Bacteria	Proteobacteria	Alphaproteobacteria	Caulobacterales	Caulobacteraceae	Caulobacter
Otu000506	0	0	0	0	0	0	0	0	0	0	0.0028372	0	0.00698714	0	0	0	Bacteria	Proteobacteria	Betaproteobacteria	Burkholderiales	Comamonadaceae	unclassified
Otu000312	0	0	0	0	0	0	0	0	0	0	0	0	0	0	0	0	Bacteria	Actinobacteria	Thermoleophilia	Solirubrobacterales	Solirubrobacteraceae	Solirubrobacter
Otu000269	0	0	0	0	0	0.00183928	0	0	0	0	0	0	0	0	0.0166903	0	Bacteria	Bacteroidetes	Flavobacteriia	Flavobacteriales	Flavobacteriaceae	Chryseobacterium
Otu000348	0	0	0	0	0	0	0	0	0	0	0	0	0	0	0	0	Bacteria	Bacteroidetes	Sphingobacteriia	Sphingobacteriales	Sphingobacteriaceae	Solitalea
Otu000416	0	0	0.00169279	0	0	0	0	0	0	0	0	0	0	0	0	0.00763825	Bacteria	Bacteroidetes	unclassified	unclassified	unclassified	unclassified
Otu000512	0	0.0121758	0	0	0	0	0	0	0	0	0	0	0	0	0.0584161	0	Bacteria	Proteobacteria	Alphaproteobacteria	Rhodospirillales	Acetobacteraceae	Acidiphilium
Otu000301	0	0	0.00507838	0	0	0	0	0	0	0	0	0	0	0	0	0	Bacteria	Proteobacteria	Alphaproteobacteria	Rhizobiales	Phyllobacteriaceae	unclassified
Otu000451	0	0	0	0	0	0	0	0	0	0	0	0	0	0	0	0	Bacteria	Proteobacteria	Alphaproteobacteria	Rhodospirillales	Acetobacteraceae	Acidicaldus
Otu000406	0	0	0	0	0	0	0	0	0	0	0	0	0	0	0	0	Bacteria	Proteobacteria	Alphaproteobacteria	Rhodospirillales	DA111	unclassified
Otu000313	0.00344459	0	0.00169279	0	0	0	0	0.00334348	0.00903791	0	0	0	0	0	0	0	Bacteria	Actinobacteria	Actinobacteria	Micrococcales	Micrococcaceae	Arthrobacter
Otu000290	0	0	0	0	0	0	0	0	0	0	0	0	0	0	0	0	Bacteria	Actinobacteria	Actinobacteria	Micrococcales	Microbacteriaceae	Subtercola
Otu001103	0	0	0	0	0	0	0	0	0	0	0.0056744	0	0	0	0	0	Bacteria	Bacteroidetes	Sphingobacteriia	Sphingobacteriales	Sphingobacteriaceae	unclassified
Otu000709	0.00344459	0	0	0	0	0	0	0	0	0	0	0	0	0	0	0	Bacteria	Candidate_division_OD1	unclassified	unclassified	unclassified	unclassified
Otu000377	0	0	0	0	0	0	0	0	0	0	0	0	0	0	0	0	Bacteria	Planctomycetes	Planctomycetacia	Planctomycetales	Planctomycetaceae	Schlesneria
Otu000309	0.00688919	0.00811721	0.0389342	0.00314971	0	0.0275893	0.0117288	0.0100304	0.00903791	0	0	0.00435635	0.00698714	0.00976372	0.0166903	0.0127304	Bacteria	Firmicutes	Clostridia	Clostridiales	Gracilibacteraceae	Gracilibacter
Otu000316	0	0	0	0	0	0	0	0	0	0	0	0	0	0	0	0	Bacteria	Proteobacteria	Betaproteobacteria	Burkholderiales	Comamonadaceae	Variovorax
Otu000324	0	0	0	0	0	0	0	0	0	0	0	0	0	0	0	0	Bacteria	Proteobacteria	Betaproteobacteria	Burkholderiales	Alcaligenaceae	Achromobacter
Otu000343	0	0	0.00338558	0	0	0	0	0.00334348	0	0	0	0	0	0	0	0	Bacteria	Actinobacteria	Actinobacteria	Micrococcales	Microbacteriaceae	Cryobacterium
Otu001060	0	0	0	0	0	0	0	0	0	0	0	0	0	0	0	0	Bacteria	Verrucomicrobia	unclassified	unclassified	unclassified	unclassified
Otu000332	0	0	0	0.00314971	0	0	0	0	0	0	0	0	0	0	0	0	Bacteria	Proteobacteria	Alphaproteobacteria	Rhodospirillales	Acetobacteraceae	Roseococcus
Otu000362	0	0	0	0	0	0	0	0	0.0271137	0	0	0	0	0	0	0	Bacteria	Actinobacteria	Actinobacteria	Propionibacteriales	Propionibacteriaceae	Micropruina
Otu000382	0	0	0	0	0	0	0	0	0	0	0	0	0	0	0	0	Bacteria	Verrucomicrobia	Spartobacteria	Chthoniobacterales	DA101_soil_group	unclassified
Otu000492	0	0	0	0	0	0	0	0	0	0	0	0	0	0	0	0	Bacteria	Proteobacteria	Gammaproteobacteria	NKB5	unclassified	unclassified
Otu000345	0	0	0	0.00629941	0	0	0	0	0	0	0	0	0	0	0	0	Bacteria	Proteobacteria	Gammaproteobacteria	Xanthomonadales	Xanthomonadaceae	Stenotrophomonas
Otu000573	0	0	0.00338558	0	0	0	0	0	0	0	0	0	0	0	0	0	Bacteria	Bacteroidetes	Sphingobacteriia	Sphingobacteriales	Chitinophagaceae	Ferruginibacter
Otu000648	0.0241122	0.00405861	0.0220063	0.00944912	0	0.02575	0.0234577	0.0200609	0.00451896	0.0146007	0.0368836	0.013069	0.00698714	0.0195274	0.0125177	0.0152765	Bacteria	Actinobacteria	Thermoleophilia	Gaiellales	unclassified	unclassified
Otu000428	0	0	0	0	0	0	0	0	0	0	0	0	0	0	0	0	Bacteria	Actinobacteria	Thermoleophilia	Solirubrobacterales	0319-6M6	unclassified
Otu000380	0	0	0	0	0	0	0	0	0	0	0	0	0	0.00976372	0	0	Bacteria	Actinobacteria	Actinobacteria	PeM15	unclassified	unclassified
Otu000862	0	0	0	0	0	0	0	0	0	0	0	0	0	0	0	0	Bacteria	Planctomycetes	Planctomycetacia	Planctomycetales	Planctomycetaceae	Pir4_lineage
Otu000481	0	0	0	0	0	0	0	0	0	0	0.0056744	0	0	0	0	0	Bacteria	Proteobacteria	Alphaproteobacteria	Rhizobiales	Xanthobacteraceae	unclassified
Otu000401	0	0.0121758	0	0	0	0	0	0	0	0	0	0	0	0	0	0	Bacteria	Actinobacteria	Actinobacteria	Frankiales	Frankiaceae	Frankia
Otu000555	0	0	0	0	0	0	0	0	0	0	0	0	0	0	0	0	Bacteria	Proteobacteria	Betaproteobacteria	Burkholderiales	Comamonadaceae	Rhizobacter
Otu000410	0	0	0	0	0	0	0	0	0	0	0	0	0	0	0	0	Bacteria	Proteobacteria	Betaproteobacteria	Burkholderiales	Alcaligenaceae	Pigmentiphaga
Otu001118	0	0	0	0	0	0	0	0	0	0	0	0	0	0	0	0	Bacteria	Acidobacteria	Acidobacteria	Subgroup_6	unclassified	unclassified
Otu000413	0	0	0	0	0	0	0	0	0	0	0	0	0	0	0	0	Bacteria	Proteobacteria	Alphaproteobacteria	Rhizobiales	Rhodobiaceae	Parvibaculum
Otu000480	0	0	0	0	0	0	0	0	0	0	0	0	0	0	0	0	Bacteria	Proteobacteria	Alphaproteobacteria	Rhodospirillales	Rhodospirillaceae	Dongia
Otu000643	0	0	0	0	0	0	0	0	0	0	0	0	0	0	0	0	Bacteria	Chloroflexi	Ktedonobacteria	C0119	unclassified	unclassified
Otu000434	0	0	0.00507838	0.00314971	0	0.012875	0.0175932	0.00334348	0.00451896	0	0	0	0	0	0.0125177	0	Bacteria	Proteobacteria	Betaproteobacteria	Burkholderiales	Oxalobacteraceae	Massilia
Otu000520	0	0	0	0	0	0	0	0	0	0	0	0	0	0	0	0	Bacteria	Verrucomicrobia	Opitutae	Opitutales	Opitutaceae	Opitutus
Otu000840	0	0	0	0	0	0	0	0	0	0	0	0	0	0	0.00417258	0	Bacteria	Planctomycetes	Planctomycetacia	Planctomycetales	Planctomycetaceae	Planctomyces
Otu001017	0	0	0	0	0	0	0	0	0.00451896	0	0	0	0	0	0	0	Bacteria	Firmicutes	Clostridia	Clostridiales	Defluviitaleaceae	Incertae_Sedis
Otu000641	0.0378905	0.0121758	0.0135423	0.0220479	0	0.012875	0.0293221	0.0133739	0.00903791	0	0.0255348	0.00435635	0.0209614	0.0195274	0.0166903	0.030553	Bacteria	Firmicutes	Clostridia	Clostridiales	Ruminococcaceae	Anaerotruncus
Otu000876	0.0103338	0	0.0169279	0.00314971	0	0.0147143	0.00586441	0.0100304	0.00451896	0	0.0056744	0.00435635	0.00698714	0.00976372	0.0125177	0.00254608	Bacteria	Actinobacteria	Actinobacteria	Micrococcales	unclassified	unclassified
Otu000509	0	0	0	0	0	0	0	0	0	0	0	0	0	0	0	0	Bacteria	Proteobacteria	Gammaproteobacteria	Xanthomonadales	Nevskiaceae	Nevskia
Otu000623	0.00344459	0.0162344	0.00338558	0.0220479	0.0745712	0.0110357	0.00586441	0.0133739	0.00903791	0.043802	0.0113488	0.013069	0	0.0195274	0.00417258	0	Bacteria	Firmicutes	Clostridia	Clostridiales	Ruminococcaceae	Papillibacter
Otu000853	0.00344459	0	0	0	0	0	0	0	0	0	0	0	0	0	0	0	Bacteria	Gemmatimonadetes	Gemmatimonadetes	Gemmatimonadales	Gemmatimonadaceae	Gemmatimonas
Otu000508	0	0	0	0	0	0	0	0	0	0	0	0	0	0	0	0	Bacteria	Verrucomicrobia	Verrucomicrobiae	Verrucomicrobiales	Verrucomicrobiaceae	Haloferula
Otu000724	0	0	0	0	0	0	0	0	0	0	0	0	0	0	0.00417258	0	Bacteria	Proteobacteria	Alphaproteobacteria	Rhizobiales	Hyphomicrobiaceae	Rhodoplanes

## Sheet: steril_fungi
#OTU ID	T0-S	T5-Sf	T5-Sc	T6-Sf	T6-Sc	T7-Sf	T7-Sc	T8-Sf	T8-Sc	T1-Sf	T1-Sc	T2-Sf	T2-Sc	T3-Sf	T3-Sc	T4-Sf	T4-Sc	Kingdom	Phylum	Class	Order	Family	Genus	Species
Otu000046	0.436737	17.0084	1.74316	62.6851	5.43564	40.6912	59.4756	10.8568	0.00373539	0.381679	0.491803	1.47637	1.80934	0.441573	1.04559	6.85709	1.39104	Fungi	Ascomycota	Leotiomycetes	Helotiales	Helotiales_family_Incertae_sedis	Leptodontidium	Leptodontidium_elatius
Otu000020	1.29737	3.03844	9.21804	0.199174	19.3393	0.0027715	3.19864	0.666999	0.00747077	1.71756	3.55191	0.481425	64.0202	32.165	10.7569	6.93234	3.91551	Fungi	Ascomycota	Saccharomycetes	Saccharomycetales	Debaryomycetaceae	Scheffersomyces	Scheffersomyces_shehatae
Otu000014	0.963391	0.00571135	3.2401	0.101031	5.34825	0.00138575	0.375062	0.00184764	0.00747077	0.763359	2.58652	0.232689	8.88469	24.4661	0.368331	23.8289	2.00927	Fungi	Ascomycota	Saccharomycetes	Saccharomycetales	Trichomonascaceae	Sugiyamaella	Sugiyamaella_novakii
Otu000062	1.05331	0.616826	1.59543	0.0317524	3.27711	0.393553	0.622744	5.50043	0.00373539	0.381679	1.7122	0.417235	0.216041	0.0548847	0.190107	0.156769	0.927357	Fungi	Ascomycota	unclassified	unclassified	unclassified	unclassified	unclassified
Otu000888	0.256904	0.862414	0.896199	1.17773	0.629206	0.00415726	0.137994	0	0	0	0.364299	0.200594	0.0450086	0.0149686	0.170304	0.00313539	0.463679	Fungi	Ascomycota	Leotiomycetes	Helotiales	Helotiales_family_Incertae_sedis	Leptodontidium	Leptodontidium_sp_Di124_4
Otu001194	0.0770713	0.0114227	1.29998	0.0259793	1.00498	0	0.251221	0.00184764	0	0	0.200364	0	0.0810154	0	0.0198028	0	0.824317	Fungi	Ascomycota	Leotiomycetes	Helotiales	Vibrisseaceae	Phialocephala	unclassified
Otu000136	0.0642261	0	0.748474	0.00865976	0.471904	0	0.0353832	0	0	0	1.07468	0	0.0180034	0	0.00792111	0	0.566718	Fungi	Basidiomycota	Agaricomycetes	Cantharellales	Hydnaceae	Sistotrema	Sistotrema_brinkmannii
Otu000214	0.0128452	0	0.797715	0.00288659	0.541816	0	0.166301	0	0	0	0.0910747	0	0	0	0.00792111	0	0.515198	Fungi	Basidiomycota	Agaricomycetes	Polyporales	Phanerochaetaceae	Phanerochaete	unclassified
Otu000054	0.0256904	0	0.00984834	0.0230927	0.498121	0	0.0247682	0	0.00373539	0	0.10929	0	0.0270051	0	0.07129	0	0.360639	Fungi	Ascomycota	Saccharomycetes	Saccharomycetales	Saccharomycetales_family_Incertae_sedis	Candida	Candida_derodonti
Otu000892	0	0	0.640142	0.0144329	1.10985	0.0027715	0.0849197	0	0.00373539	0	0.0546448	0	0.0270051	0.00249476	0.0118817	0	0.875837	Fungi	Ascomycota	Leotiomycetes	unclassified	unclassified	unclassified	unclassified
Otu000908	0	0	0.17727	0.13567	0.576772	0	0	0.00184764	0	0	0.255009	0.06419	0.0810154	0	0.0158422	0	0.10304	Fungi	Ascomycota	Leotiomycetes	Helotiales	unclassified	unclassified	unclassified
Otu000401	0	0.605403	0.088635	0	0.0349559	0.0914596	0.0459982	0.591246	7.2728	0	0	0.0481425	0.00900171	2.20038	0.328726	2.11011	0.257599	Fungi	Ascomycota	Sordariomycetes	Hypocreales	Hypocreaceae	unclassified	unclassified
Otu000882	0	0.29699	0.029545	1.22391	0.139823	0.710891	1.33041	0.205088	0	0.19084	0.0182149	0.0240713	0	0.00997904	0.0198028	0.141092	0	Fungi	Ascomycota	Leotiomycetes	Helotiales	Helotiales_family_Incertae_sedis	Leptodontidium	unclassified
Otu000861	0.0770713	0	0.029545	0.00577317	0.157301	0.00138575	0.0212299	0	0	0	0.0910747	0.00802375	0	0	0.0158422	0	0	Fungi	Ascomycota	Leotiomycetes	Helotiales	Helotiales_family_Incertae_sedis	Cadophora	Cadophora_melinii
Otu000080	0	0	0.088635	0.00577317	0.139823	0	0.00707664	0	0	0	0	0.12838	0.0720137	0	0	0	0.15456	Fungi	Basidiomycota	Tremellomycetes	unclassified	unclassified	unclassified	unclassified
Otu000180	0	0	0.196967	0	0.0436948	0	0.0212299	0	0	0	0.0364299	0	0	0	0.00792111	0	0	Fungi	Basidiomycota	Agaricomycetes	Polyporales	Fomitopsidaceae	Ischnoderma	Ischnoderma_sp
Otu000395	0	0	0.167422	0.00288659	0.0786507	0	0	0	0	0	0.0546448	0	0	0	0	0	0.0515198	Fungi	Ascomycota	Eurotiomycetes	Chaetothyriales	Herpotrichiellaceae	Cladophialophora	Cladophialophora_chaetospira
Otu000496	0.141297	0	0.0787867	0	0.0699117	0	0	0	0	0.19084	0	0	0	0	0	0.00313539	0	Fungi	Ascomycota	Saccharomycetes	Saccharomycetales	Saccharomycetales_family_Incertae_sedis	Candida	Candida_sp_EN15M01
Otu000291	0	0	0.0393933	0.0115463	0.0961286	0	0.00353832	0.00184764	0	0	0.0910747	0.032095	0	0	0	0	0	Fungi	Ascomycota	Eurotiomycetes	Chaetothyriales	Herpotrichiellaceae	Capronia	Capronia_pilosella
Otu000777	0	0	0.11818	0	0.0436948	0	0.0141533	0	0	0	0	0	0	0	0.0277239	0	0	Fungi	Ascomycota	Sordariomycetes	Xylariales	Xylariaceae	Hypoxylon	Hypoxylon_rubiginosum
Otu000002	0.0513809	0	0.11818	0.00288659	0.0699117	0.0027715	0.00707664	0	0	0.19084	0.400729	0.096285	0.0180034	0	0.00396055	0.0125415	0	Fungi	unclassified	unclassified	unclassified	unclassified	unclassified	unclassified
Otu001561	0	0	0.0787867	0	0.0524338	0	0.0283066	0	0	0	0	0	0	0	0	0	0	Fungi	Ascomycota	Sordariomycetes	Chaetosphaeriales	Chaetosphaeriaceae	Zignoella	Zignoella_pulviscula
Otu000118	0	0	0.05909	0	0	0	0.010615	0	0	0	0	0	0	0	0	0	0	Fungi	Basidiomycota	Agaricomycetes	Agaricales	Mycenaceae	Mycena	Mycena_haematopus
Otu000422	0	0	0.0196967	0	0.104868	0	0	0	0	0	0	0	0	0	0	0	0	Fungi	Ascomycota	Dothideomycetes	Capnodiales	Davidiellaceae	Cladosporium	Cladosporium_sp_CBS_55279
Otu001046	0	0	0.05909	0	0.235952	0	0.010615	0	0	0	0	0	0	0	0	0	0	Fungi	Ascomycota	Sordariomycetes	Chaetosphaeriales	Chaetosphaeriaceae	Chaetosphaeria	Chaetosphaeria_innumera
Otu000173	0	0	0.00984834	0.0115463	0.0611728	0	0	0	0	0	0	0	0.0180034	0	0	0	0	Fungi	Basidiomycota	Microbotryomycetes	Sporidiobolales	Sporidiobolales_family_Incertae_sedis	Sporobolomyces	Sporobolomyces_singularis
Otu000833	0.0770713	0	0.00984834	0	0.0436948	0	0	0	0	0	0	0	0	0	0	0	0.10304	Fungi	Ascomycota	Sordariomycetes	Coniochaetales	Coniochaetaceae	unclassified	unclassified
Otu000161	0	0	0.029545	0	0	0	0	0	0	0	0	0	0	0	0.00792111	0	0.0515198	Fungi	Basidiomycota	Agaricomycetes	Polyporales	Meruliaceae	Hyphoderma	Hyphoderma_praetermissum
Otu000955	0	0	0.00984834	0	0.00873897	0	0.0247682	0	0	0	0	0	0	0	0	0	0	Fungi	Ascomycota	Leotiomycetes	Helotiales	Helotiales_family_Incertae_sedis	Catenulifera	Catenulifera_luxurians
Otu000171	0	0.00571135	0.00984834	0.00288659	0.0436948	0	0	0	0	0	0	0	0	0	0	0	0	Fungi	Basidiomycota	Microbotryomycetes	Sporidiobolales	Sporidiobolales_family_Incertae_sedis	Rhodotorula	Rhodotorula_lignophila
Otu001566	0	0	0	0	0	0	0	0	0	0	0	0	0.0180034	0	0	0	0	Fungi	Ascomycota	Leotiomycetes	Helotiales	Hyaloscyphaceae	Polydesmia	Polydesmia_pruinosa
Otu000491	0	0	0.05909	0	0	0	0	0	0	0	0.0546448	0	0	0	0	0	0	Fungi	Ascomycota	Sordariomycetes	Sordariomycetes_order_Incertae_sedis	Sordariomycetes_family_Incertae_sedis	Xylomelasma	Xylomelasma_sp
Otu000899	0	0	0	0	0.0524338	0	0	0	0	0	0	0	0.117022	0	0	0	0	Fungi	Basidiomycota	Dacrymycetes	Dacrymycetales	Dacrymycetaceae	Calocera	Calocera_cornea
Otu000306	0.192678	0.00571135	0.157573	0.00288659	0.0961286	0	0.0530748	0	0	0	0.10929	0.160475	0.0270051	0	0.0316844	0	0.10304	Fungi	Ascomycota	Sordariomycetes	unclassified	unclassified	unclassified	unclassified
Otu000938	0	0	0.0196967	0	0.0699117	0	0	0	0	0	0	0	0	0	0	0	0	Fungi	Ascomycota	Leotiomycetes	Helotiales	Helotiales_family_Incertae_sedis	Scytalidium	Scytalidium_lignicola
Otu000501	0	0	0	0	0	0	0.00353832	0	0	0	0	0	0	0	0	0	0	Fungi	Ascomycota	Eurotiomycetes	Eurotiales	Trichocomaceae	Talaromyces	unclassified
Otu000023	0	0	0.029545	0	0.00873897	0	0	0	0	0	0	0	0	0	0	0	0	Fungi	Basidiomycota	unclassified	unclassified	unclassified	unclassified	unclassified
Otu000746	0	0	0	0.00577317	0	0	0	0	0	0	0.0546448	0	0	0	0	0	0	Fungi	Ascomycota	Sordariomycetes	Hypocreales	Nectriaceae	Cosmospora	unclassified
Otu001498	0	0	0.0393933	0	0.0349559	0	0	0	0	0	0	0	0	0	0	0	0	Fungi	Ascomycota	Dothideomycetes	Dothideomycetes_order_Incertae_sedis	Myxotrichaceae	Oidiodendron	Oidiodendron_griseum
Otu000951	0	0	0	0	0	0	0	0	0	0	0	0	0	0	0	0	0	Fungi	Ascomycota	Sordariomycetes	Chaetosphaeriales	Chaetosphaeriaceae	Chaetosphaeria	Chaetosphaeria_sp_olrim419
Otu000122	0	0	0.00984834	0	0	0	0	0	0	0	0	0	0	0	0.00396055	0	0	Fungi	Ascomycota	Eurotiomycetes	Chaetothyriales	Herpotrichiellaceae	unclassified	unclassified
Otu000205	0	0	0	0	0	0	0	0	0	0	0.0364299	0	0	0	0	0	0	Fungi	Basidiomycota	Agaricomycetes	Atheliales	Atheliaceae	Fibulorhizoctonia	Fibulorhizoctonia_sp
Otu000353	0	0	0	0	0	0	0	0	0	0	0	0.0401188	0	0	0	0	0.0515198	Fungi	Ascomycota	Sordariomycetes	Hypocreales	unclassified_Hypocreales	unclassified_Hypocreales	Hypocreales_sp_GPO_CO_01_H6
Otu000636	0	0	0	0.279999	0.0349559	0	0	0.105316	0	0	0	0	0	0	0	0	0	Fungi	Ascomycota	Sordariomycetes	Xylariales	Xylariaceae	Nemania	Nemania_sp
Otu001375	0	0	0	0	0.0611728	0	0	0	0	0	0	0	0	0	0	0	0	Fungi	Ascomycota	Leotiomycetes	Helotiales	Helotiaceae	unclassified_Helotiaceae	uncultured_Ascocoryne
Otu001473	0	0	0	0	0	0	0	0	0	0	0	0	0	0	0	0	0	Fungi	Ascomycota	Dothideomycetes	Dothideomycetes_order_Incertae_sedis	Myxotrichaceae	Oidiodendron	unclassified
Otu000067	0	0	0.00984834	0	0	0	0.0283066	0	0	0	0.0546448	0.0240713	0	0	0.00792111	0	0.0515198	Fungi	Basidiomycota	Tremellomycetes	Cystofilobasidiales	Cystofilobasidiaceae	Mrakia	Mrakia_frigida
Otu001497	0	0	0.05909	0	0	0	0	0	0	0	0	0	0	0	0	0	0	Fungi	Ascomycota	Leotiomycetes	Helotiales	Hyaloscyphaceae	Haplographium	Haplographium_delicatum
Otu000788	0	0	0.0787867	0	0.0349559	0	0	0	0	0	0	0	0	0	0	0	0	Fungi	Ascomycota	Sordariomycetes	Sordariomycetes_order_Incertae_sedis	unclassified	unclassified	unclassified
Otu001080	0	0	0.029545	0	0	0	0	0	0	0	0	0	0	0	0	0	0	Fungi	Ascomycota	Leotiomycetes	Leotiomycetes_order_Incertae_sedis	Leotiomycetes_family_Incertae_sedis	Geomyces	Geomyces_auratus
Otu000211	0	0	0.0196967	0	0.0436948	0	0	0	0	0	0	0	0	0	0	0	0.15456	Fungi	Ascomycota	Eurotiomycetes	Chaetothyriales	Herpotrichiellaceae	Exophiala	Exophiala_moniliae
Otu001472	0	0	0	0	0	0	0	0	0	0	0	0	0	0	0	0	0	Fungi	Ascomycota	Leotiomycetes	Rhytismatales	Rhytismataceae	Lophodermium	Lophodermium_piceae
Otu000107	0	0	0	0	0	0	0	0	0	0	0	0	0	0	0	0	0	Fungi	Zygomycota	Zygomycota_class_Incertae_sedis	Mucorales	Umbelopsidaceae	Umbelopsis	unclassified
Otu000032	0	0	0	0	0.0524338	0	0	0	0	0	0	0	0	0	0	0	0	Fungi	Basidiomycota	Microbotryomycetes	unclassified	unclassified	unclassified	unclassified
Otu000580	0	0	0	0	0.00873897	0	0	0	0	0	0	0	0	0	0	0	0	Fungi	Ascomycota	Sordariomycetes	Xylariales	Diatrypaceae	Eutypa	Eutypa_spinosa
Otu000543	0	0	0	0	0	0	0	0	0	0	0	0	0	0	0	0	0	Fungi	Ascomycota	Sordariomycetes	Xylariales	Xylariaceae	Kretzschmaria	Kretzschmaria_deusta
Otu000410	0	0	0	0	0	0	0	0	0	0	0	0	0	0	0	0	0	Fungi	Ascomycota	Sordariomycetes	Sordariales	Cephalothecaceae	unclassified_Cephalothecaceae	Cephalothecaceae_sp
Otu000070	0	0	0.0689383	0	0.00873897	0	0.0176916	0	0.00747077	0.19084	0.0546448	0.0481425	0.0270051	0	0.0277239	0	0	Fungi	Basidiomycota	Tremellomycetes	Tremellales	Tremellales_family_Incertae_sedis	Cryptococcus	unclassified
Otu000370	0	0	0	0	0	0	0	0	0	0	0	0	0	0	0	0	0	Fungi	Ascomycota	Eurotiomycetes	Chaetothyriales	Herpotrichiellaceae	Cladophialophora	Cladophialophora_sp_olrim407
Otu000044	0	0	0	0.00288659	0	0	0	0	0	0	0	0	0	0	0	0	0	Fungi	Zygomycota	Zygomycota_class_Incertae_sedis	Mortierellales	Mortierellaceae	Mortierella	Mortierella_parvispora
Otu000758	0	0	0	0	0	0	0	0	0	0	0	0	0	0	0	0	0	Fungi	Ascomycota	Sordariomycetes	Sordariomycetes_order_Incertae_sedis	Annulatascaceae	Rhodoveronaea	Rhodoveronaea_varioseptata
Otu000015	0	0	0	0	0.0349559	0	0	0	0	0	0	0	0	0	0	0	0	Fungi	Zygomycota	Zygomycota_class_Incertae_sedis	Mortierellales	Mortierellaceae	Mortierella	unclassified
Otu000712	0	0	0	0	0	0	0	0	0	0	0	0	0	0	0	0	0	Fungi	Ascomycota	Eurotiomycetes	Eurotiales	Trichocomaceae	Penicillium	Penicillium_spinulosum
Otu000572	0	0	0	0	0	0	0	0	0	0	0	0	0	0	0	0	0	Fungi	Ascomycota	Eurotiomycetes	Eurotiales	Trichocomaceae	Aspergillus	Aspergillus_kanagawaensis
Otu000845	0.0770713	0	0.00984834	0.0173195	0.0786507	0	0	0	0	0	0.200364	0.0160475	0.108021	0	0	0	0	Fungi	Ascomycota	Dothideomycetes	Pleosporales	Pleosporales_family_Incertae_sedis	unclassified	unclassified
Otu000368	0	0	0	0	0	0	0	0	0	0	0	0	0	0	0	0	0	Fungi	Ascomycota	Eurotiomycetes	Chaetothyriales	Herpotrichiellaceae	Cladophialophora	unclassified
Otu000038	0	0	0	0	0	0	0	0	0	0	0	0	0	0	0	0	0	Fungi	Basidiomycota	Microbotryomycetes	Sporidiobolales	Sporidiobolales_family_Incertae_sedis	Rhodotorula	unclassified
Otu000918	0	0	0	0	0	0	0	0	0	0	0	0	0	0	0	0	0	Fungi	Ascomycota	Leotiomycetes	Helotiales	Helotiales_family_Incertae_sedis	unclassified	unclassified
Otu000794	0	0	0.0689383	0	0	0	0	0	0	0	0.382514	0	0	0	0.00396055	0	0	Fungi	Ascomycota	Dothideomycetes	Pleosporales	unclassified	unclassified	unclassified
Otu000801	0	0	0	0	0	0	0	0	0	0	0	0	0	0	0	0	0	Fungi	Ascomycota	Dothideomycetes	Pleosporales	Lophiostomataceae	Lophiostoma	Lophiostoma_sp
Otu000739	0	0	0.05909	0	0	0	0	0	0	0.19084	0	0	0	0	0	0	0	Fungi	Ascomycota	Sordariomycetes	Hypocreales	Cordycipitaceae	unclassified	unclassified
Otu000786	0	0	0	0	0.0699117	0	0	0	0	0	0	0	0	0	0	0	0	Fungi	Basidiomycota	Tremellomycetes	Cystofilobasidiales	Cystofilobasidiales_family_Incertae_sedis	Syzygospora	Syzygospora_sp

## Sheet: Sample name description
Sample name description
Sf	sterile divierstiy level	fluctuating temperature regime
Sc	sterile divierstiy level	constant temperature regime
T0	Start
T1	1 week incubation
T2	2 weeks incubation
T3	3 weeks incubation
T4	4 weeks incubation
T5	5 weeks incubation
T6	6 weeks incubation
T7	7 weeks incubation
T8	8 weeks incubation
